# Supplementary material for: Opposing Effects of Adenosine and Inosine in Human Subcutaneous Fibroblasts May Be Regulated by Third Party ADA Cell Providers
Source: PubMed Central journal article supplement (PMC7140481; doi:10.3390/cells9030651), 2020-03-07
Supplement: cells-09-00651-s001.pdf [file cells-09-00651-s001.pdf]

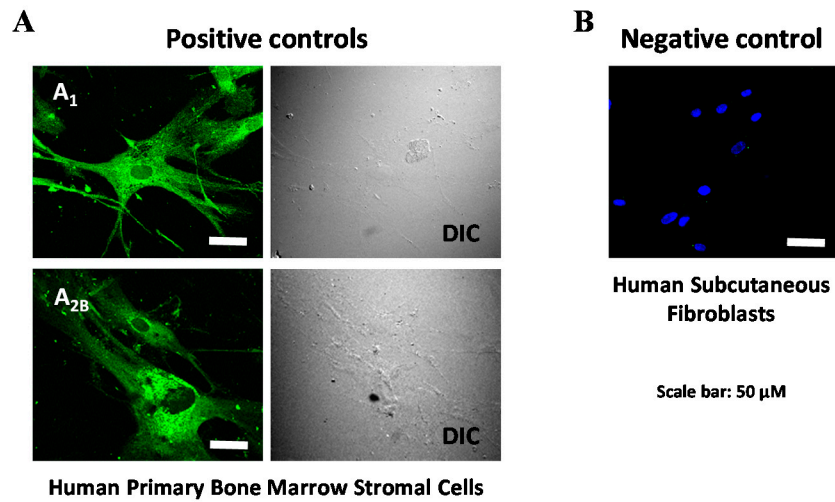

**Figure S1.** Panel A, shows positive identification of adenosine A<sub>1</sub> and A<sub>2B</sub> receptors on cultured human primary bone marrow stromal cells undergoing osteogenic differentiation. Cells grown for 21 days in 8-well chamber slides were processed for immunocytochemistry with the same experimental procedure and antibodies (anti-A<sub>1</sub> #AB1587P and anti-A<sub>2B</sub> #AB1589P from Chemicon, Temecula, CA, USA) used for HSCF (e.g. Figure 1; for details see Materials and Methods). Visualization was performed using the same settings in the confocal microscope (Olympus FV1000, Tokyo, Japan); Differential interference contrast (DIC) images are shown for comparison. Panel B, shown is a negative control carried out by replacing specific primary antibodies by non-immune serum; nuclei are stained with DAPI (blue). Scale bar = 50 μm.
